# Supplementary material for: Predictors of aetiology and outcomes of acute gastrointestinal illness in returning travellers: a retrospective cohort analysis
Source: Springer Nature journal article supplement (doi:10.1186/s12879-021-06223-3), 2021-06-23
Supplement: MOESM1 [file 19287638]

| <b>Symptoms Reported in Group 4:Other (n=40)</b> |
|--------------------------------------------------|
| Pruritis ani                                     |
| Passage of suspected parasite/helminth in stool  |
| Vomiting                                         |
| Constipation                                     |
| Altered bowel habit                              |
| Nausea                                           |
| Presence of suspected worm in emesis             |
| Oral ulceration                                  |

**Supplementary Table 1**
